# Supplementary material for: HIV-Exposed Uninfected Children: A Systematic Review on Psychological Well-Being and Association with School Performances in Africa
Source: MDPI journal article supplement (doi:10.3390/ijerph20032499), 2023-01-31
Supplement: s1 [file s1]

| N | Author(s)                    | Country      | Sample (N)                                                                                                                     | Age (years) | Domain assessed | Measurements                                                                                                                                                                                                                                                                                                                                                                                                                             | Type of study                  |
|---|------------------------------|--------------|--------------------------------------------------------------------------------------------------------------------------------|-------------|-----------------|------------------------------------------------------------------------------------------------------------------------------------------------------------------------------------------------------------------------------------------------------------------------------------------------------------------------------------------------------------------------------------------------------------------------------------------|--------------------------------|
| 1 | Cluver et al., 2007 [36]     | South Africa | 1025 children (425 orphaned by HIV/AIDS, 241 orphaned by non-HIV/AIDS causes, 81 orphaned by unknown causes, 278 not orphaned) | 10 – 19     | Individual      | CDI; R-CMAS; SDQ using the 5-items peer problems subscale; Amaya-Jackson's Child PTSD Checklist; SDQ using the 5-items conduct problems subscale; CBCL YSR using the 11-items delinquent subscale                                                                                                                                                                                                                                        | Quantitative study, interviews |
| 2 | Betancourt et al., 2011 [39] | Rwanda       | 43 children (HIV/AIDS-affected) and 31 adults                                                                                  | 10 – 17     | Individual      | Free-Listing interview: "What are the problems of HIV/AIDS-affected children in this community?"<br>Key Informant Interviews: "Tell me more about the problem of <i>agahinda kenshi</i> (persistent sorrow) among HIV/AIDS-affected children in this community"; "How does a child with <i>agahinda kenshi</i> feel?"; "How does a child with <i>agahinda kenshi</i> behave?"; "How does a child with <i>agahinda kenshi</i> think about | Qualitative study              |

|   |                              |              |                                                                       |         |            |                                                                                                                                                                                                                                                                                                                                                                                                               |                                             |
|---|------------------------------|--------------|-----------------------------------------------------------------------|---------|------------|---------------------------------------------------------------------------------------------------------------------------------------------------------------------------------------------------------------------------------------------------------------------------------------------------------------------------------------------------------------------------------------------------------------|---------------------------------------------|
|   |                              |              |                                                                       |         |            | themselves or others?"                                                                                                                                                                                                                                                                                                                                                                                        |                                             |
| 3 | Han et al., 2013 [20]        | Uganda       | 297 children (orphaned by HIV/AIDS)                                   | 12 – 14 | Individual | BHS; CDI                                                                                                                                                                                                                                                                                                                                                                                                      | Two-arm cluster randomized controlled trial |
| 4 | Sipsma et al., 2013 [35]     | South Africa | Children (HEU) and 509 mothers (395 HIV-positive, 114 HIV-negative)   | 6 – 10  | Individual | VABS; CBCL; CDI; RCMAS; BOEQI YV                                                                                                                                                                                                                                                                                                                                                                              |                                             |
| 5 | Betancourt et al., 2014 [27] | Rwanda       | 683 children (218 HIV-positive, 228 HIV-affected, 237 HIV-unaffected) | 10 – 17 | Individual | WHODAS-Child; CESDC; YSR; anxiety/internalizing scale; Parental Acceptance and Rejection Questionnaire using 16-items; United Nations Children's Fund's Multiple Indicator Cluster Survey using 12-items; Post-War Adversities Index; SAFE child protection checklist using 17-items; HIV-related stigma reported on a 4-point Likert scale of <i>never</i> , <i>sometimes</i> , or <i>often/a lot</i> ; HSCL | Case-control study                          |
| 6 | Govender et al., 2014 [22]   | South Africa | 623 children (226 orphaned by HIV/AIDS, 397 not orphaned)             | 9 – 15  | Individual | YSR; SACAS                                                                                                                                                                                                                                                                                                                                                                                                    | Cross-sectional study                       |
| 7 | Barenbau et al. 2016         | South Africa | 100 children (vulnerable or                                           | 12 – 22 | Individual | PAS-A; RADS-2; R-CMAS                                                                                                                                                                                                                                                                                                                                                                                         | The study investigated the                  |

|    |                              |                                           |                                                   |                                          |            |                                                                                                             |                                                                                                                     |
|----|------------------------------|-------------------------------------------|---------------------------------------------------|------------------------------------------|------------|-------------------------------------------------------------------------------------------------------------|---------------------------------------------------------------------------------------------------------------------|
|    | [58]                         |                                           | orphaned by HIV/AIDS)                             |                                          |            |                                                                                                             | role of social support and attachment on positive well-being among orphaned and vulnerable children due to HIV/AIDS |
| 8  | Ezeamama et al., 2016 [47]   | Uganda                                    | 166 children (58 HIV-positive, 55 HEU, 53 HUU)    | 6 – 18                                   | Individual | BRIEF questionnaire                                                                                         | Comparative study                                                                                                   |
| 9  | Milligan et al., 2017 [46]   | South Africa                              | 273 children (95 HIV-positive, 86 HEU, 92 HUU)    | Mean age: 7.42, 7.36, 7.05, respectively | Individual | AWMA; ELP                                                                                                   | Case control study                                                                                                  |
| 10 | Nkwata et al., 2017 [48]     | Uganda                                    | 168 children (58 HIV-positive, 54 HEU, 56 HUU)    | 3 – 18*                                  | Individual | PedsQL; medical history; physical examination, and laboratory evaluations                                   | Retrospective cohort study                                                                                          |
| 11 | Lowenthal, et al., 2018 [50] | Botswana                                  | 650 children (200 HIV-positive, 200 HEU, 250 HUU) | 7 – 18                                   | Individual | PennCNB; PSC                                                                                                | Case-control study                                                                                                  |
| 12 | Robb et al., 2018 [51]       | South Africa and United States of America | Three cohorts: HIV-positive, HEU, HUU             | Adolescents                              | Individual | Higher cognition; executive, emotional and behavioural functioning; identify the determinants of resilience | Case-control study                                                                                                  |
| 13 | Boivin, et al., 2019 [49]    | Malawi and Uganda                         | Three cohorts: HIV-positive, HUU, HEU             | 12                                       | Individual | BPG; CCRT                                                                                                   | Case-control study                                                                                                  |
| 14 | Cluver et al., 2012          | South Africa                              | 599 children                                      | 10 – 20                                  | Social     | Questionnaire:                                                                                              | Mixed qualitative                                                                                                   |

|    |                             |              |                                                                                                 |                |        |                                                                                                                                                                                                                         |                                                   |
|----|-----------------------------|--------------|-------------------------------------------------------------------------------------------------|----------------|--------|-------------------------------------------------------------------------------------------------------------------------------------------------------------------------------------------------------------------------|---------------------------------------------------|
|    | [52]                        |              | (212 with HIV/AIDS condition at home, 140 with other- conditions at home, 247 in healthy homes) |                |        | educational outcomes when controlling for sociodemographic s                                                                                                                                                            | and quantitative study                            |
| 15 | Campbell et al., 2014 [62]  | Zimbabwe     | 128 children                                                                                    | 10 – 14        | Social | Children story about HIV in the school context                                                                                                                                                                          | Qualitative study draws and write story about HIV |
| 16 | Nabunya et al., 2014 [45]   | Uganda       | 1410 children (orphaned by HIV/AIDS)                                                            | Mean age: 12.7 | Social | Questions on the effects of parental loss on children's feelings: 1) How has the loss of your father affected the way you feel about life? and 2) How has the loss of your mother affected the way you feel about life? | Quantitative study; survey                        |
| 17 | Watkins et al., 2014 [60]   | South Africa | 243 children (orphaned by HIV/AIDS)                                                             | 13 – 22        | Social | Open ended questions to elicit individual perspective on education; risk and protective factors                                                                                                                         | Qualitative study                                 |
| 18 | Collishaw et al., 2015 [31] | South Africa | 944 children (425 orphaned by HIV/AIDS, 241 orphaned by non-HIV/AIDS causes, 278 not orphaned)  | 10 – 19        | Social | CDI; RCMAS; CPTSDC; SDQ; CBCL                                                                                                                                                                                           | Longitudinal study                                |
| 19 | Skovdal, 2016 [23]          | Kenya        | 47 children (vulnerable children and                                                            | 10 – 20        | Social | Interview: school experiences of HIV affected children                                                                                                                                                                  | Qualitative study                                 |

|    |                              |                         |                                                                                                              |                    |                        |                                                                                                                                                   |                                                                                                |
|----|------------------------------|-------------------------|--------------------------------------------------------------------------------------------------------------|--------------------|------------------------|---------------------------------------------------------------------------------------------------------------------------------------------------|------------------------------------------------------------------------------------------------|
|    |                              |                         | orphaned by HIV/AIDS) and 18 teachers                                                                        |                    |                        |                                                                                                                                                   |                                                                                                |
| 20 | Visser et al., 2012 [64]     | South Africa            | 45 children/ HIV-positive mothers dyads                                                                      | 6 – 10 and 25 – 42 | Individual, and family | N/A                                                                                                                                               | Qualitative study                                                                              |
| 21 | Orkin et al., 2013 [42]      | South Africa            | 723 children (269 orphaned by HIV/AIDS, 103 with HIV/AIDS condition at home, 351 not orphaned)               | 11 – 25            | Individual, and family | Educational outcome; poverty; CDI; RCMA; CPTSD                                                                                                    | Quantitative study                                                                             |
| 22 | Betancourt et al., 2014 [21] | Rwanda                  | 39 children and 28 caregivers                                                                                | 7 – 17 and 30 – 70 | Individual and family  | Family connectedness; good parenting; CD-RIS; pro-social behaviour; MICS; CESDC; ISSB; YSR; IRQ; YCPS-RS; WHODAS-Child                            | Pre-post design, including 6-month follow-up; qualitative and quantitative study; Intervention |
| 23 | Sherr et al., 2014 [34]      | South Africa            | 381 children (24 double orphans because of HIV/AIDS, 70 single orphans because of HIV/AIDS, 287 not orphans) | 8 – 19             | Individual and family  | RSE; SEQ-C; CDI; SDQ; Adapted Community Maltreatment, Exploitation, Stigma & Discrimination Scale; P-C CTS; Externalizing and Risk Behavior Scale | Interview; quantitative study                                                                  |
| 24 | Casale et al., 2015 [55]     | South Africa            | 2477 children/ caregivers dyads                                                                              | 10 – 17 and >18    | Individual and family  | MOS-SSS; APQ – short form; SF-12; SDQ                                                                                                             | Cross-sectional household survey                                                               |
| 25 | Skeen et al., 2016 [29]      | Malawi and South Africa | 588 children (HIV-affected)                                                                                  | 4 – 13*            | Individual and family  | CDI; TSCC; RSE; SDQ; SAHA P-C                                                                                                                     | Cross-sectional study                                                                          |

|    |                           |              |                                                                                                |         |                       |                                                                                                                                                                                                                                                                         |                               |
|----|---------------------------|--------------|------------------------------------------------------------------------------------------------|---------|-----------------------|-------------------------------------------------------------------------------------------------------------------------------------------------------------------------------------------------------------------------------------------------------------------------|-------------------------------|
|    |                           |              |                                                                                                |         |                       | CTS; Child Abuse and Neglected screening tools                                                                                                                                                                                                                          |                               |
| 26 | Nalugya et al., 2018 [56] | Uganda       | 38 HIV-positive parents                                                                        | 18 – 61 | Individual and family | First interview (unstructured): life and illness history; second interview (semi structured): life history and HIV self-management; role of children with their parents                                                                                                 | Qualitative study             |
| 27 | Cluver et al., 2008 [37]  | South Africa | 944 children (425 orphaned by HIV/AIDS, 241 by non-HIV/AIDS causes, and 278 not orphaned)      | 10 – 19 | Individual and social | CDI; CMAS-R; SDQ; PTSD; CBC; Social and Health Assessment Peer Victimization Scale; self-report of past-year experience of witnessing or having been a victim of the study area's four most common community crimes; Berger Stigma Scale for HIV-positive youth—Revised | Quantitative study; interview |
| 28 | Cluver et al., 2009 [19]  | South Africa | 944 children (425 orphaned by HIV/AIDS, 241 orphaned by non-HIV/AIDS causes, 278 not orphaned) | 10 – 19 | Individual and social | CDI; CMAS; SDQ; PTSD -C                                                                                                                                                                                                                                                 | Quantitative study; interview |
| 29 | Cluver et al., 2009 [38]  | South Africa | 1050 children (HIV-affected)                                                                   | 10 – 19 | Individual and social | CDI; CMAS; SDQ; PTSD-C; Social and Health                                                                                                                                                                                                                               | Quantitative study; interview |

|    |                                 |                                    |                                                                    |         |                           |                                                                                                                                                                                                      |                                                                                                                                                             |
|----|---------------------------------|------------------------------------|--------------------------------------------------------------------|---------|---------------------------|------------------------------------------------------------------------------------------------------------------------------------------------------------------------------------------------------|-------------------------------------------------------------------------------------------------------------------------------------------------------------|
|    |                                 |                                    |                                                                    |         |                           | Assessment Peer<br>Victimization<br>Scale; Berger<br>Stigma Scale for<br>HIV-positive<br>youth–Revised                                                                                               |                                                                                                                                                             |
| 30 | Nordtveit, 2010<br>[18]         | Namibia<br>eSwatini<br>(Swaziland) | and 70 children<br>40 adults                                       | 8 – 17  | Individual and<br>social  | School as a<br>protective factor<br>and HIV context.<br>Unstructured, semi<br>structured, and<br>open-ended<br>questions                                                                             | Qualitative studies:<br>2 cases studies in<br>Namibia and<br>Swaziland<br>(eSwatini)                                                                        |
| 31 | Mueller et al., 2011<br>[28]    | South Africa                       | 297 children (HIV-<br>affected)                                    | 8 – 18  | Individual and<br>social  | RSES; SEQ; CDI;<br>SDQ; Snider scale<br>for Stigma, social<br>connection and<br>experiencing<br>violence; Social<br>and Health<br>Assessment Scale,<br>psychosociodemo<br>graphic<br>characteristics | Quasi<br>experimental<br>project: art to<br>increase self-<br>esteem and self-<br>efficacy                                                                  |
| 32 | Okawa, 2011<br>[30]             | Kenya                              | 398 children<br>(orphaned by<br>HIV/AIDS) pairs<br>with caregivers | 10 – 18 | Individual and<br>social  | MSPSS; CES-DC;<br>RSES                                                                                                                                                                               | Cross-sectional<br>study                                                                                                                                    |
| 33 | Kagotho et al.,<br>2012<br>[53] | Uganda                             | 297 caregivers                                                     | 18 – 87 | Individual, and<br>social | Depression                                                                                                                                                                                           | Longitudinal study                                                                                                                                          |
| 34 | Pufall et al., 2014<br>[65]     | Zimbabwe                           | 4577 children<br>(HIV-affected, HIV-<br>positive)                  | 6 – 17  | Individual and<br>social  | CWI; monitoring<br>and evaluation<br>facility survey                                                                                                                                                 | Data from a cross-<br>sectional<br>household survey<br>were linked to data<br>on schools from a<br>parallel monitoring<br>and evaluation<br>facility survey |

|    |                              |                         |                                                                                                |          |                       |                                                                                                                                            |                                          |
|----|------------------------------|-------------------------|------------------------------------------------------------------------------------------------|----------|-----------------------|--------------------------------------------------------------------------------------------------------------------------------------------|------------------------------------------|
| 35 | Thurman et al., 2014 [40]    | South Africa            | 1487 children (HIV/AIDS-affected)<br>918 caregivers                                            | 10 – 17  | Individual and social | CESDC; World Health Organization Quality of Life subscale                                                                                  | Longitudinal quasi-experimental design   |
| 36 | Nicholson et al., 2015 [66]  | Zambia                  | 390 children (111 HEU, 279 HUU)                                                                | 6 – 12   | Individual and social | General health, school report                                                                                                              | Cross-sectional study                    |
| 37 | Sseswamala et al., 2016 [69] | Uganda                  | 346 children (orphaned by HIV/AIDS)                                                            | 12 – 16  | Individual and social | School primary leaving examination; child confidence in achieving educational plans; Beck hopelessness scale; Tennessee self-concept scale | Randomized experiment case control study |
| 38 | Scorza et al., 2017 [61]     | Rwanda                  | 367 children (HIV-affected)                                                                    | 10 – 17  | Individual and social | CD-RISC; protective and risk factors                                                                                                       | Qualitative study                        |
| 39 | Sherr et al., 2017 [44]      | Malawi and South Africa | 588 children (HIV-positive, HIV-affected, HUU)                                                 | 4 – 12*  | Individual and social | Draw-a-person Test; Digit Span Test                                                                                                        | Quantitative study                       |
| 40 | Sherr et al., 2017 [70]      | Malawi and South Africa | 854 children (HIV-affected)                                                                    | 5 – 15 * | Individual and social | CSI; Educational risk; grant receipt; number of grants; good parenting; Draw a Person test                                                 | Cash grant intervention                  |
| 41 | Phaladze et al., 2018 [67]   | Botswana                | 732 children (orphaned by HIV/AIDS)                                                            | 10 – 18  | Individual and social | School grade, loss and grief, living arrangement                                                                                           | Qualitative study; interview             |
| 42 | Sharp et al., 2018 [43]      | South Africa            | 750 children (224 orphaned by HIV/AIDS, 276 orphaned by non-HIV/AIDS causes, 250 not orphaned) | 7 – 11   | Individual and social | SDQ; School Connectedness Scale                                                                                                            | Cross-sectional study                    |



|    |                           |              |                                                                        |                |                                |                                                                                                                                                                                |                                            |
|----|---------------------------|--------------|------------------------------------------------------------------------|----------------|--------------------------------|--------------------------------------------------------------------------------------------------------------------------------------------------------------------------------|--------------------------------------------|
| 43 | Webster et al., 2018 [57] | Uganda       | 168 children (HEU, HUU)<br>106 caregivers (HIV-positive, HIV-negative) | 6 – 18         | Individual and social          | Distress Weinberger Adjustment Inventory; Children's Hopelessness Scale; Positive Outlook-Individual Protective Factors Index; Hare Area-specific self-esteem scale; PedsQLTM  | Cross- sectional study                     |
| 44 | Katisi et al., 2019 [68]  | Botswana     | 650 children (orphaned by HIV/AIDS)                                    | 11 – 17        | Individual and social          | Child and Youth Resilience Measure-28; 5-point Inventory of Complicated Grief ; 3-point Future Aspirations/Peer Leader Survey                                                  | Quasi-experimental; pre-test and post-test |
| 45 | Small et al., 2019 [32]   | South Africa | 475 children (HIV-affected)                                            | 9 – 13         | Individual and social          | General health questionnaire; global indicator of well-being; CBCL; Neighborhood Social Control Scale; Neighborhood Social Cohesion Scale; Neighbourhood Disorganization Scale | Longitudinal study                         |
| 46 | Lachman et al., 2014 [54] | South Africa | 2477 children-caregivers dyads (HEU, HUU)                              | 10 – 17<br>>18 | Individual, family, and social | APQ; BNS 8-items about poverty; CESD, MOS-SSS; SDQ                                                                                                                             | Cross-sectional survey                     |
| 47 | Anabwani et al.,          | Botswana     | 1238 children                                                          | 6 – 18         | Individual, family,            | Questions about                                                                                                                                                                | Survey interview                           |

|    |                                 |                            |                                                     |         |                                   |                                                                                                                                                                                                                                         |                                      |
|----|---------------------------------|----------------------------|-----------------------------------------------------|---------|-----------------------------------|-----------------------------------------------------------------------------------------------------------------------------------------------------------------------------------------------------------------------------------------|--------------------------------------|
|    | 2016<br>[63]                    |                            | (984 children<br>HIV-positive,<br>254 HIV-affected) |         | and social                        | school, activities,<br>care, and stigma                                                                                                                                                                                                 |                                      |
| 48 | Hensels et al.,<br>2016<br>[41] | Malawi and South<br>Africa | 979 children<br>(HIV-affected)                      | 4 – 13* | Individual, family,<br>and social | CSI; P-C CTS;<br>SDQ; ISPCAN;<br>CDI; RSES; TSCC;<br>Experience of<br>Stigma,<br>Discrimination and<br>Social Exclusion<br>Domain; PedsQL<br>Draw-a-person<br>Test; Digit Span<br>Test; Ten<br>Questions<br>disability<br>questionnaire | Longitudinal study                   |
| 49 | Ashry et al., 2017<br>[33]      | Egypt                      | 65 children<br>(33 HEU,<br>32 HUU)                  | 3 – 17* | Individual, family,<br>and social | HRQOL; KINDL                                                                                                                                                                                                                            | Cross sectional<br>comparative study |
| 50 | Slogrove et al.,<br>2020<br>[7] | Global                     | HEU children                                        | N/A     | Individual, family,<br>and social | N/A                                                                                                                                                                                                                                     | Report                               |

**Table S1.** Summary of the 50 studies analysed in the present systematic review.

Acronyms used: Child Depression Inventory (CDI); Revised Children's Manifest Anxiety Scale (R-CMAS); Strengths and Difficulties Questionnaire (SDQ); Post-Traumatic Stress Disorder (PTSD); Child Behavior Checklist Youth Self-Report (CBCL YSR); Beck Hopeless Scale (BHS); Vineland Adaptive Behavior Scales (VABS); Child Behavior Checklist (CBCL); Revised-Children's Manifest Anxiety Scale (RCMAS); Bar-On Emotional Quotient Inventory: Youth Version (BOEQI YV); World Health Organization Disability Assessment Schedule for Children (WHODAS-Child); Centre for Epidemiologic Studies Depression Scale for Children (CESDC); Achenbach Youth Self Report (YSR); subscales of South African Child Assessment Schedule (SACAS); Psycho-Social Adjustment Scale-Adolescents (PAS-A); Reynolds Adolescent Depression Scale 2 (RADs-2); Behaviour Rating Inventory of Executive Function (BRIEF); Automatic Working Memory Assessment (AWMA); English Language Proficiency (ELP); Pediatric Quality of Life inventory (PedsQL ); Penn Computerized Neurocognitive Battery (PennCNB); Paediatric Symptom Checklist, (PSC); Brain Powered Games (BPG); Computerized Cognitive Rehabilitation Therapy (CCRT); Connor-Davidson Resilience Scale (CD-RISC); Multiple Indicator Cluster Survey-Round 4 (MICS4); Inventory of Socially Supportive Behaviors (ISSB); Irritability Questionnaire (IRQ); Youth Conduct Problems Scale-Rwanda Short Form (YCPS-RS); Rosenberg Self-Esteem Scale (RSE); Self-Efficacy Questionnaire for Children (SEQ-C); adapted Strauss Conflict Tactics

Scale, Parent-Child version (P-C CTS); Medical Outcomes Study Social Support Scale (MOS-SSS); Alabama Parenting Questionnaire (APQ); 12-item Short Form Survey (SF-12); Trauma Symptom Checklist for Children (TSCC); Social and Health Assessment (SAHA); Multidimensional Scale of Perceived Social Support (MSPSS); Center for Epidemiologic Studies Depression Scale for Children (CES-DC); Child Well-being Index (CWI); Connor Davidson Resilience Scale (CD-RISC); Mullen Scales of Early Learning (MSEL); Color Object Association Test (COAT); Early Childhood Vigilance Test (ECVT); Behavior Rating Inventory of Executive Function–Preschool version (BRIEF-P); Home Observation for the Measurement of the Environment (HOME); Hopkins Symptoms Checklist-25 (HSCL); Quality of Life (QOL); Basic Necessities Scale (BNS); Child Status Index (CSI); International Society for the Prevention of Child Abuse and Neglect (ISPCAN); Health-Related Quality of Life (HRQOL); Kinder Lebensqualität Fragebogen (KINDL).
